# Supplementary material for: Living Donor Candidates’ Self-reported Health and Health Perceptions and Completion of Donor Evaluation: A Cohort Study
Source: PubMed Central journal article supplement — Kidney Med. 2024 Oct 4;6(11):100909. doi: 10.1016/j.xkme.2024.100909 (PMC11554918; doi:10.1016/j.xkme.2024.100909), 2024-10-04
Supplement: mmc1.pdf [file mmc1.pdf]

## **Item S1 – Survey instruments**

**Instructions:** How much do you agree with the following statements?

- 1... Strongly Disagree
- 2... Disagree
- 3... Neutral
- 4... Agree
- 5... Strongly Agree

1. You get sick easier than others.
2. You probably will get sick a lot in the future.
3. You never worry about your health.
4. People get sick easier than you do.
5. You expect to have better health than others.
6. You worry about your health more than others.
7. Your body resists illness.
8. Getting sick is part of life.
9. Your health will be worse in the future compared to now.
10. Others are more concerned about your health.
11. You expect a healthy life.
12. Your health is a concern (a priority).
13. You accept that sometimes you are sick.
14. Whenever something is going around you catch it.
15. You worry or are concerned about your health.

**Instructions:** How do you rate the following?

- 5... Excellent
- 4... Very good
- 3... Good
- 2... Fair
- 1... Poor

1. Your health?
2. Your quality of life?
3. Your physical health?
4. Your mental health, including your mood and ability to think?

5. Your satisfaction with your social activities and relationships?
6. How well do you carry out your usual social activities and roles? (This includes activities at home, at work, and in your community, and responsibilities as a parent, child, spouse, employee, friend, etc.)
7. To what extent are you able to carry out your everyday physical activities (e.g. walking, climbing, stairs, carrying groceries, or moving a chair)?
  - 5... Completely
  - 4... Mostly
  - 3... Moderately
  - 2... A little
  - 1... Not at all
8. How often have you been bothered by emotional problems such as feeling anxious, depressed, or irritable?
  - 1... Never
  - 2... Rarely
  - 3... Sometimes
  - 4... Often
  - 5... Always
9. How would you rate your fatigue on average?
  - 1... None
  - 2... Mild
  - 3... Moderate
  - 4... Severe
  - 5... Very severe
10. On a scale from 0 to 10, with 0 being no pain and 10 being the worst imaginable pain, how would you rate your pain on average?
  - 0
  - 1
  - 2
  - 3
  - 4
  - 5
  - 6
  - 7
  - 8
  - 9
  - 10

**Table S1. Association between reported health measures and donor candidates' odds of an in-clinic evaluation excluding 171 donors deemed ineligible at the phone interview/laboratory testing phase prior to in-person clinic evaluation.**

|                                                                      | PROMIS Physical and Mental Health (Model 1) |             |         | Davies and Wares Health Perception Domains (Model 2) |             |         | PROMIS and Davies and Wares Health Perception (Model 3) |             |         |
|----------------------------------------------------------------------|---------------------------------------------|-------------|---------|------------------------------------------------------|-------------|---------|---------------------------------------------------------|-------------|---------|
|                                                                      | OR                                          | 95% CI      | p-value | OR                                                   | 95% CI      | p-value | OR                                                      | 95% CI      | p-value |
| <i>PROMIS Physical and Mental Health (per SD change in z-score)</i>  |                                             |             |         |                                                      |             |         |                                                         |             |         |
| Global Physical Health                                               | 1.40                                        | [1.13-1.73] | 0.002   |                                                      |             |         | 1.37                                                    | [1.09-1.72] | 0.007   |
| Global Mental Health                                                 | 1.04                                        | [0.85-1.27] | 0.69    |                                                      |             |         | 1.03                                                    | [0.84-1.26] | 0.78    |
| <i>Davies and Ware Health Perceptions (per SD change in z-score)</i> |                                             |             |         |                                                      |             |         |                                                         |             |         |
| Health Outlook                                                       |                                             |             |         | 1.25                                                 | [1.03-1.51] | 0.024   | 1.11                                                    | [0.91-1.37] | 0.30    |
| Resistance to Illness                                                |                                             |             |         | 1.07                                                 | [0.88-1.30] | 0.51    | 0.99                                                    | [0.81-1.21] | 0.93    |
| Health Worry                                                         |                                             |             |         | 0.97                                                 | [0.83-1.13] | 0.69    | 0.98                                                    | [0.84-1.14] | 0.76    |
| Sickness Orientation                                                 |                                             |             |         | 1.15                                                 | [0.98-1.35] | 0.08    | 1.16                                                    | [0.99-1.37] | 0.06    |
| C-statistic                                                          | 0.68                                        | [0.65-0.72] |         | 0.68                                                 | [0.64-0.72] |         | 0.69                                                    | [0.65-0.73] |         |

Higher scores represent more positive health status or positive health perception with the exception of the health worry summary score and its components, denoted by an asterisk (\*), where greater values indicate greater concern for one's health

**Table S2. Association between reported health measures and donor candidates' estimated 15-year risk of kidney failure (as a %) after donation among 277 patients with sufficient and clinical laboratory data available in adjusted linear regression.\***

|                                                                      | PROMIS Physical and Mental Health (Model 1) |               |         | Davies and Wares Health Perception Domains (Model 2) |               |         | PROMIS and Davies and Wares Health Perception (Model 3) |               |         |
|----------------------------------------------------------------------|---------------------------------------------|---------------|---------|------------------------------------------------------|---------------|---------|---------------------------------------------------------|---------------|---------|
|                                                                      | $\beta$                                     | 95% CI        | p-value | $\beta$                                              | 95% CI        | p-value | $\beta$                                                 | 95% CI        | p-value |
| <i>PROMIS Physical and Mental Health (per SD change in z-score)</i>  |                                             |               |         |                                                      |               |         |                                                         |               |         |
| Global Physical Health                                               | 0.00                                        | [-0.02, 0.03] | 0.80    |                                                      |               |         | 0.01                                                    | [-0.02, 0.04] | 0.46    |
| Global Mental Health                                                 | -0.02                                       | [-0.05, 0.02] | 0.32    |                                                      |               |         | -0.01                                                   | [-0.04, 0.02] | 0.50    |
| <i>Davies and Ware Health Perceptions (per SD change in z-score)</i> |                                             |               |         |                                                      |               |         |                                                         |               |         |
| Health Outlook                                                       |                                             |               |         | -0.03                                                | [-0.06, 0.01] | 0.12    | -0.03                                                   | [-0.06, 0.01] | 0.10    |
| Resistance to Illness                                                |                                             |               |         | 0.01                                                 | [-0.03, 0.05] | 0.63    | 0.01                                                    | [-0.03, 0.04] | 0.63    |
| Health Worry                                                         |                                             |               |         | 0.00                                                 | [-0.02, 0.02] | 0.92    | 0.00                                                    | [-0.02, 0.02] | 0.87    |
| Sickness Orientation                                                 |                                             |               |         | 0.01                                                 | [-0.01, 0.03] | 0.32    | 0.01                                                    | [-0.01, 0.03] | 0.32    |

\*Adjusted for age, sex, race/ethnicity, and donor relationship to the intended recipient. Given mild heteroskedasticity noted during review of model assumptions, linear regression models were run with 1,000 bootstrap repetitions.
